## ERRATA

S. M. CHO and R. A. SEBAN, "Oscillation of a Gas Bubble in an Infinite Fluid," published in the February, 1969, issue of the JOURNAL OF HEAT TRANSFER, TRANS. ASME, Series C, Vol. 91, No. 1, pp. 157-159.

p. 159—Equation (3) is written incorrectly; the correct form follows:

$$\frac{dZ}{d\tau} = \pm Z^{1/6} \begin{cases} \sqrt{p_R \ln Z - Z + 1} & \text{if } n = 1 \\ \sqrt{\frac{p_R}{n-1} \left(1 - \frac{1}{Z^{n-1}}\right) - Z + 1} & \text{if } n \neq 1 \end{cases}$$

In the published version the factor before the brace read  $\frac{1}{Z^{1/6}}$
